# Supplementary figures and images for: Blockade of EP4 by ASP7657 Modulates Myeloid Cell Differentiation In Vivo and Enhances the Antitumor Effect of Radiotherapy
Source: Hindawi journal article supplement (doi:10.1155/2023/7133726), 2023-01-01

# 4T1

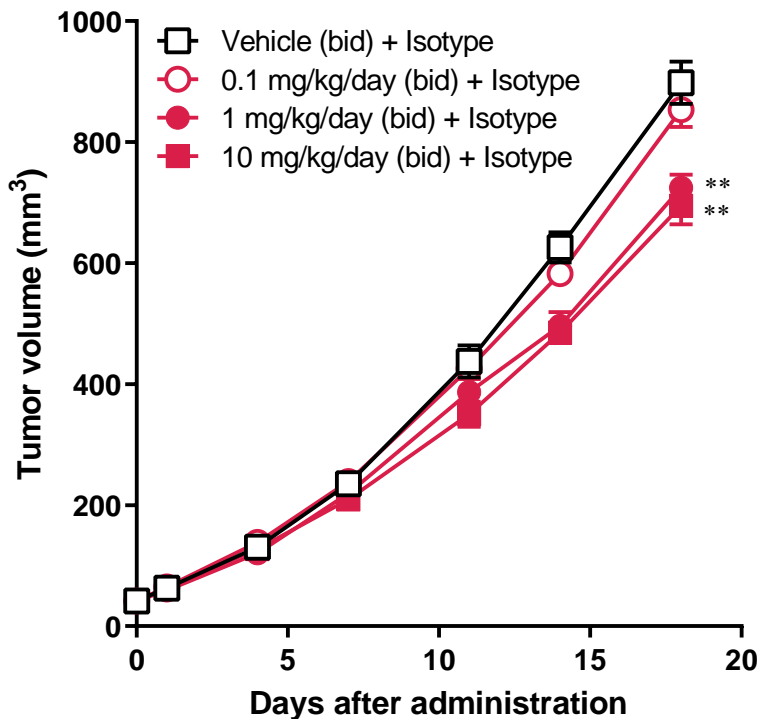

Supplement: f1 [file 7133726.f1.zip]

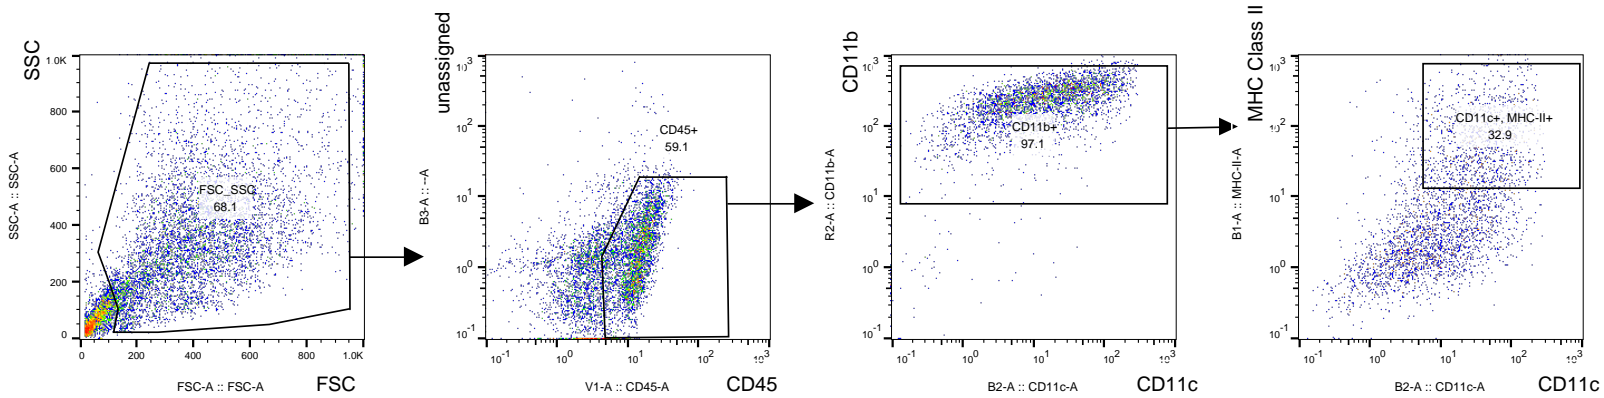

Supplement: f1 [file 7133726.f1.zip]

## LL/2(LLC1)

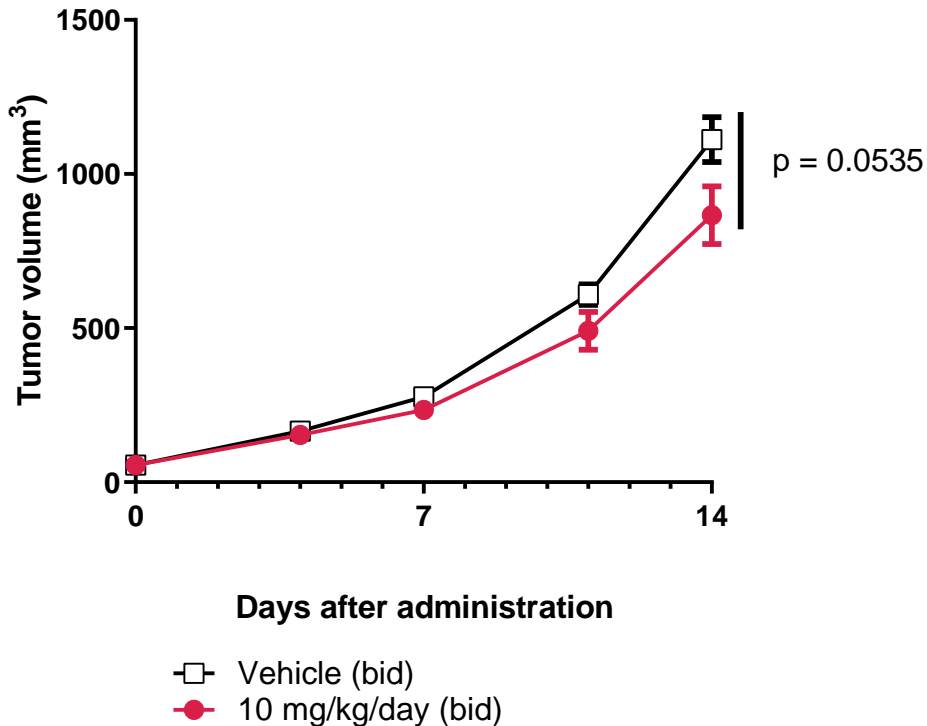

Supplement: f1 [file 7133726.f1.zip]

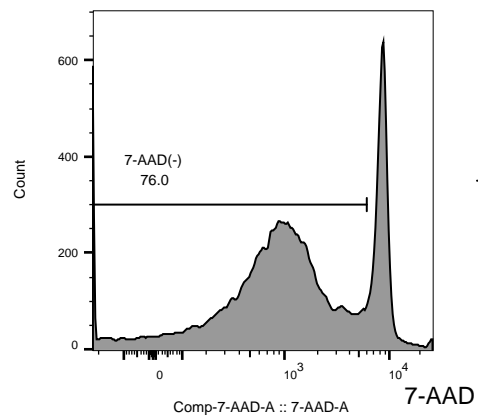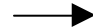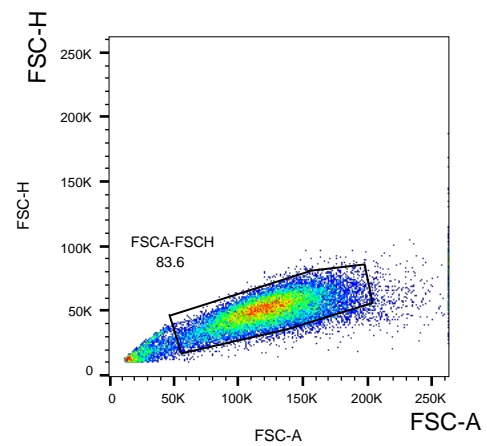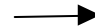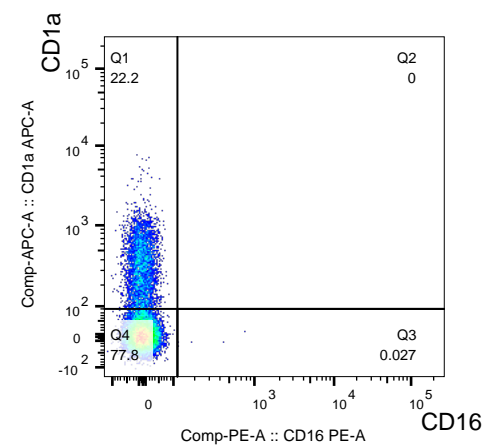

Supplement: f1 [file 7133726.f1.zip]

## EMT-6

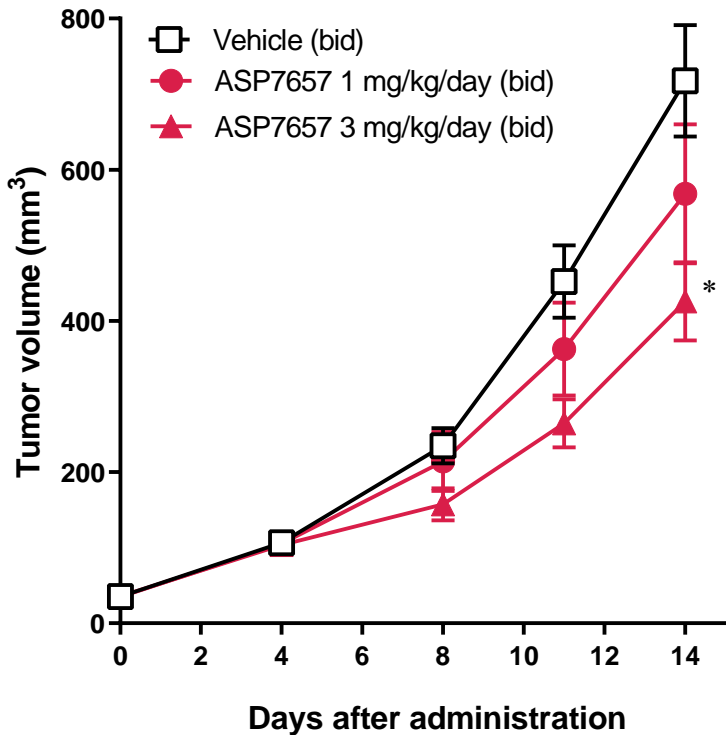

Supplement: f1 [file 7133726.f1.zip]

## B16-F10

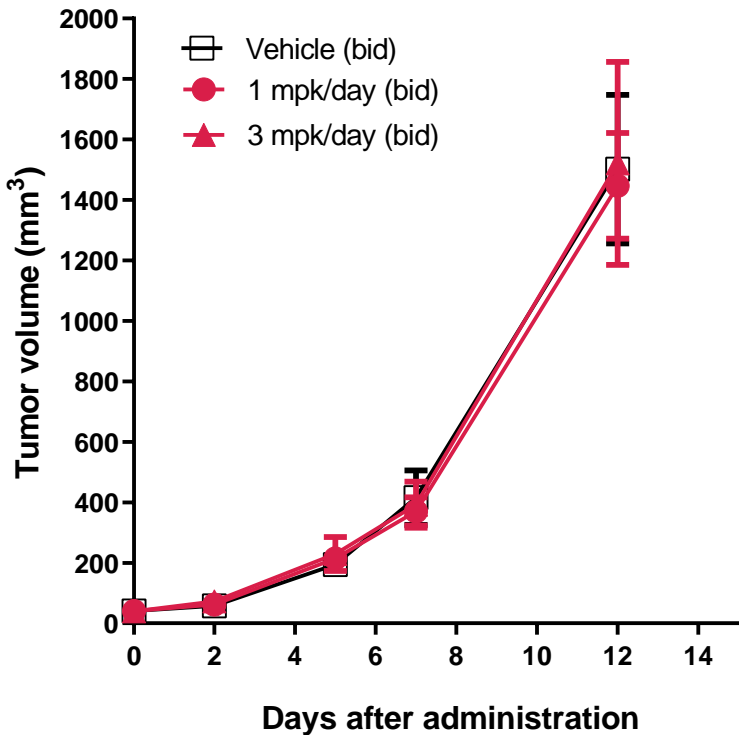

Supplement: f1 [file 7133726.f1.zip]
